# Supplementary material for: Ultrasound-enhanced cascade chemodynamic tumor nanotherapy with lactic acid-enabled hydrogen peroxide self-production
Source: Royal Society of Chemistry journal article supplement (doi:10.1039/d2bm01267g), 2022-12-22
Supplement: d2bm01267g1.pdf [file d2bm01267g1.pdf]

## **Ultrasound-Enhanced Cascade Chemodynamic Tumor Nanotherapy with Lactic Acid-Enabled Hydrogen Peroxide Self-Production**

Li Zhang<sup>†a,b</sup>, Zhuang Liu<sup>†b</sup>, Luodan Yu<sup>c</sup>, Weijun Peng<sup>\*b</sup>, Yu Chen<sup>\*c</sup> and Shengjian Zhang<sup>\*b</sup>

*a. Shanghai Institute of Medical Imaging, Shanghai 200032, P. R. China.*

*b. Department of Radiology, Fudan University Shanghai Cancer Center, Shanghai 200032, P. R. China. Department of Oncology, Fudan University Shanghai Cancer Center, Shanghai 200032, P. R. China. E-mail: [cjr.pengweijun@vip.163.com](mailto:cjr.pengweijun@vip.163.com), [zhangshengjian@yeah.net](mailto:zhangshengjian@yeah.net).*

*c. Materdicine Lab, School of Life Sciences Shanghai University, Shanghai 200444 P. R. China.  
Email: [chenyuedu@shu.edu.cn](mailto:chenyuedu@shu.edu.cn).*

† These authors contributed equally to this work.

## Supplementary figures

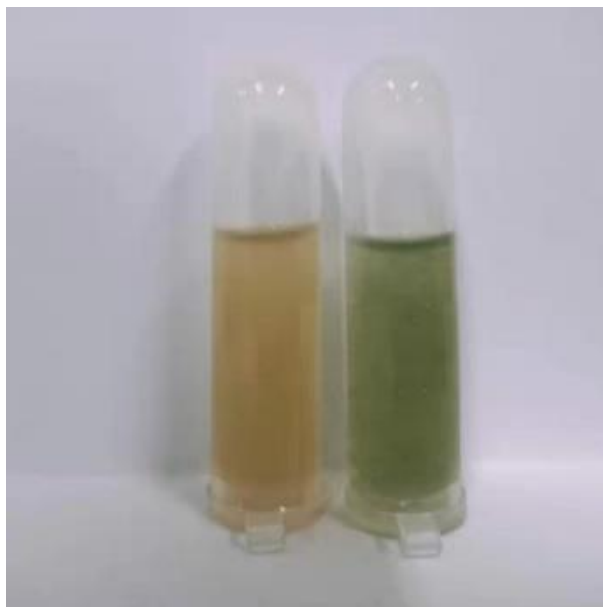

**Figure S1** The color changes after USPION@PEG-LOD solution reacted with LA in TMB solution.

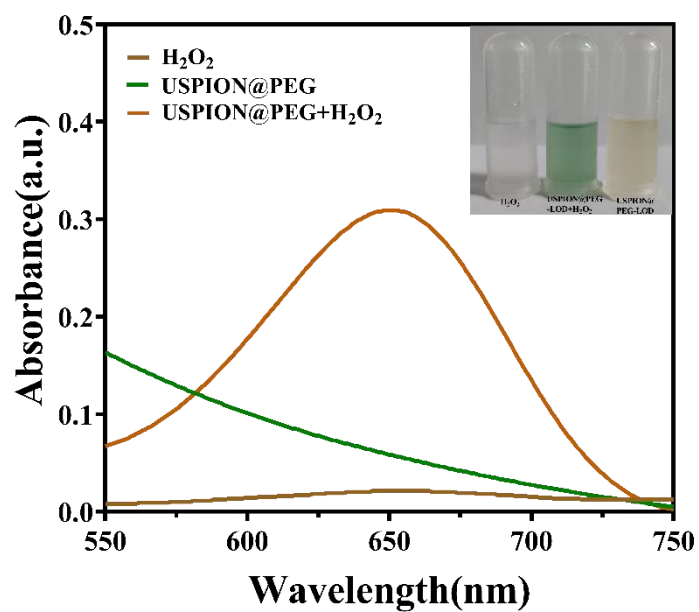

**Figure S2** The TMB UV-vis absorption curves of USPION@PEG (100 ppm) with or without H<sub>2</sub>O<sub>2</sub>.

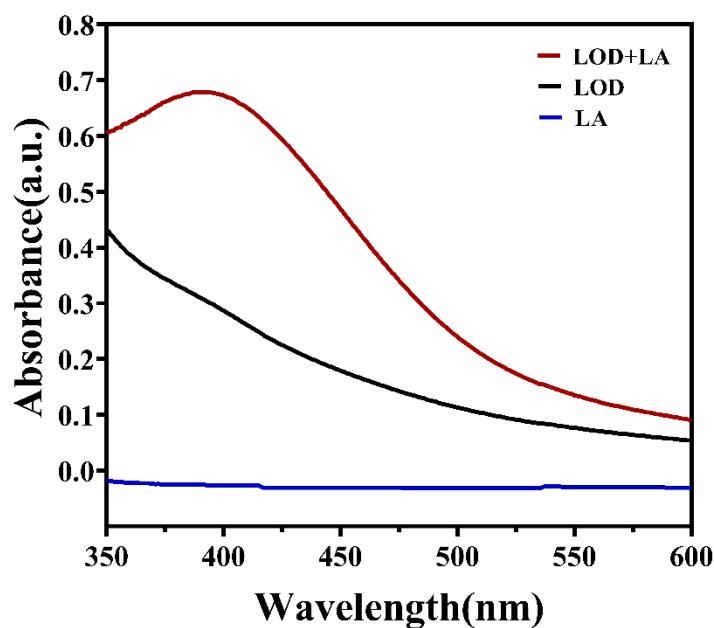

**Figure S3** By the H<sub>2</sub>O<sub>2</sub> assay kit, the UV-vis spectra detected after the LOD (1000 ppm) aqueous solution interacted with LA (50 mM) at 37 °C, separately reacted LOD or LA solution as the control group.

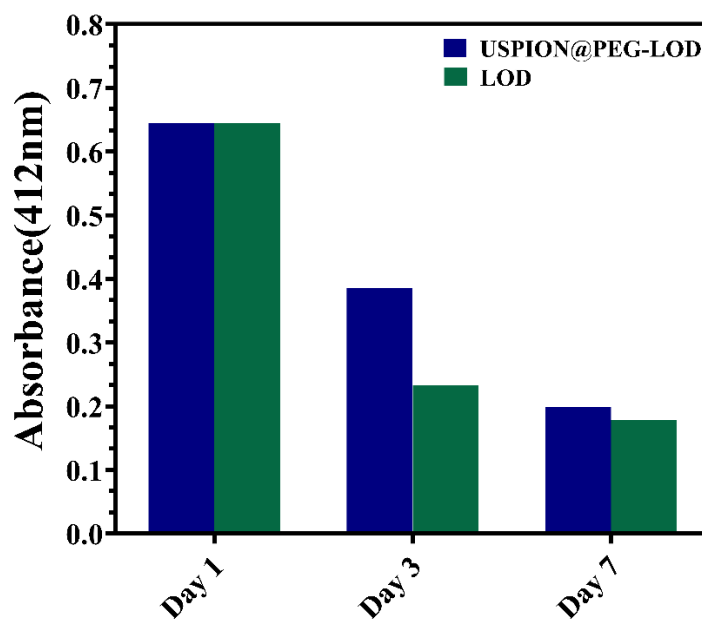

**Figure S4** After being placed at 4 °C for 0, 3, and 7 days, the USPION@PEG-LOD solution and the uncombined LOD aqueous solution reacted with LA (50 mM) at 37 °C for 5 minutes, and then a hydrogen peroxide kit was used to detect the 412 nm UV absorption peak. The concentration of LOD is 1000 ppm.

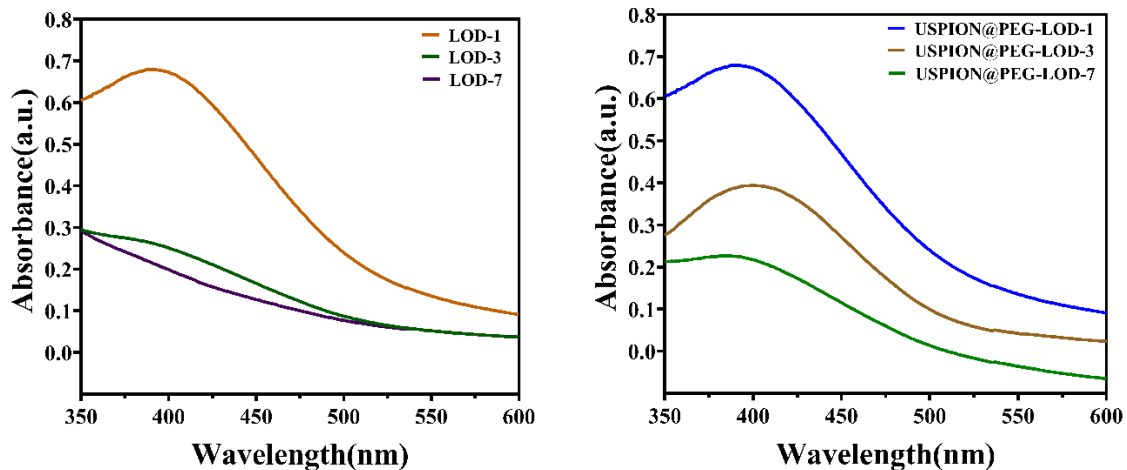

**Figure S5** By the H<sub>2</sub>O<sub>2</sub> assay kit, the ultraviolet absorption curves of LOD and USPIO@PEG-LOD solution were recorded after reaction with LA (50 mM) at 37 °C for 5 minutes, which were placed for 0, 3, and 7 days, respectively. The concentration of LOD is 1000 ppm.

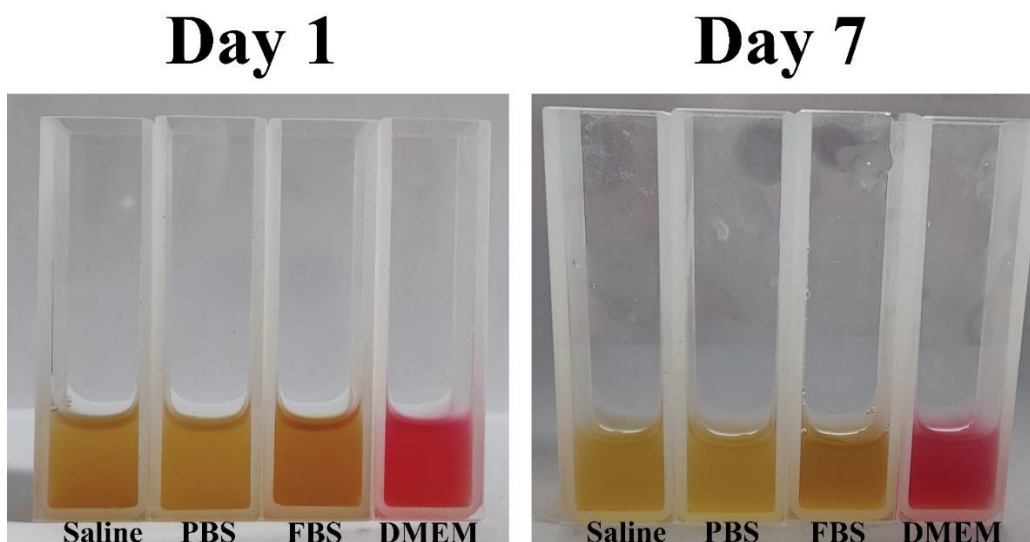

**Figure S6** After being placed at 4 °C for 0, 7 days, the USPIO@PEG-LOD solution was taken pictures respectively, which was dispersed in several representative solvents including saline, PBS, fetal calf serum (FBS), and DMEM.

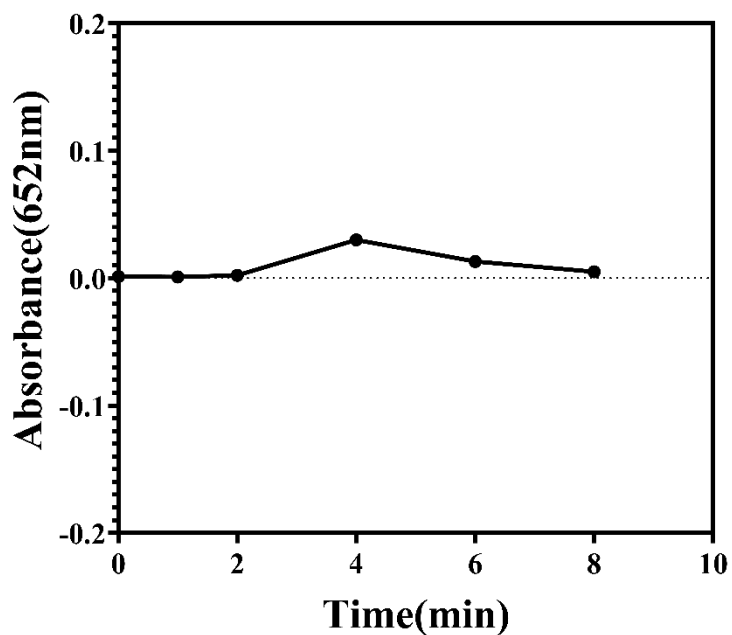

**Figure S7** The TMB aqueous solution was irradiated by ultrasound (frequency of 1.0 MHz, power density of 1.5 W/cm<sup>2</sup>, time of 1 minute) and then detected by ultraviolet spectrophotometer. The values of the UV-vis spectra at 652 nm were recorded every measurement.

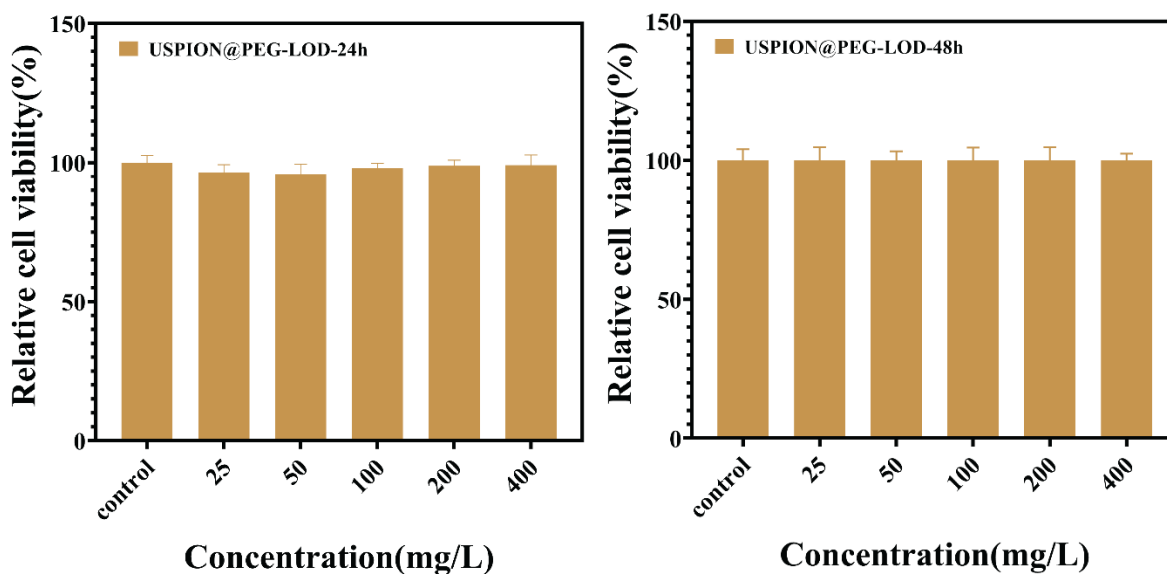

**Figure S8** The relative cell viability of 4T1 cells co-cultured with USPION@PEG-LOD solution in various concentrations for 24 hours and 48 hours, respectively.

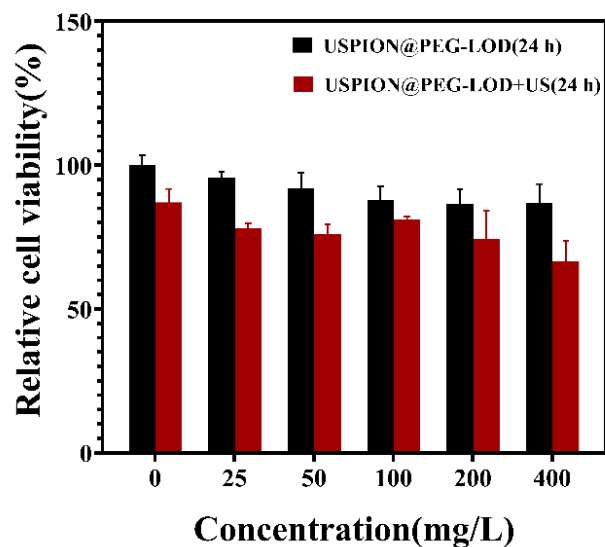

**Figure S9** The relative cell viability of 4T1 cells co-cultured with USPIO@PEG-LOD and LA solution in various concentrations for 24 hours in corporation of ultrasound treatment or not.

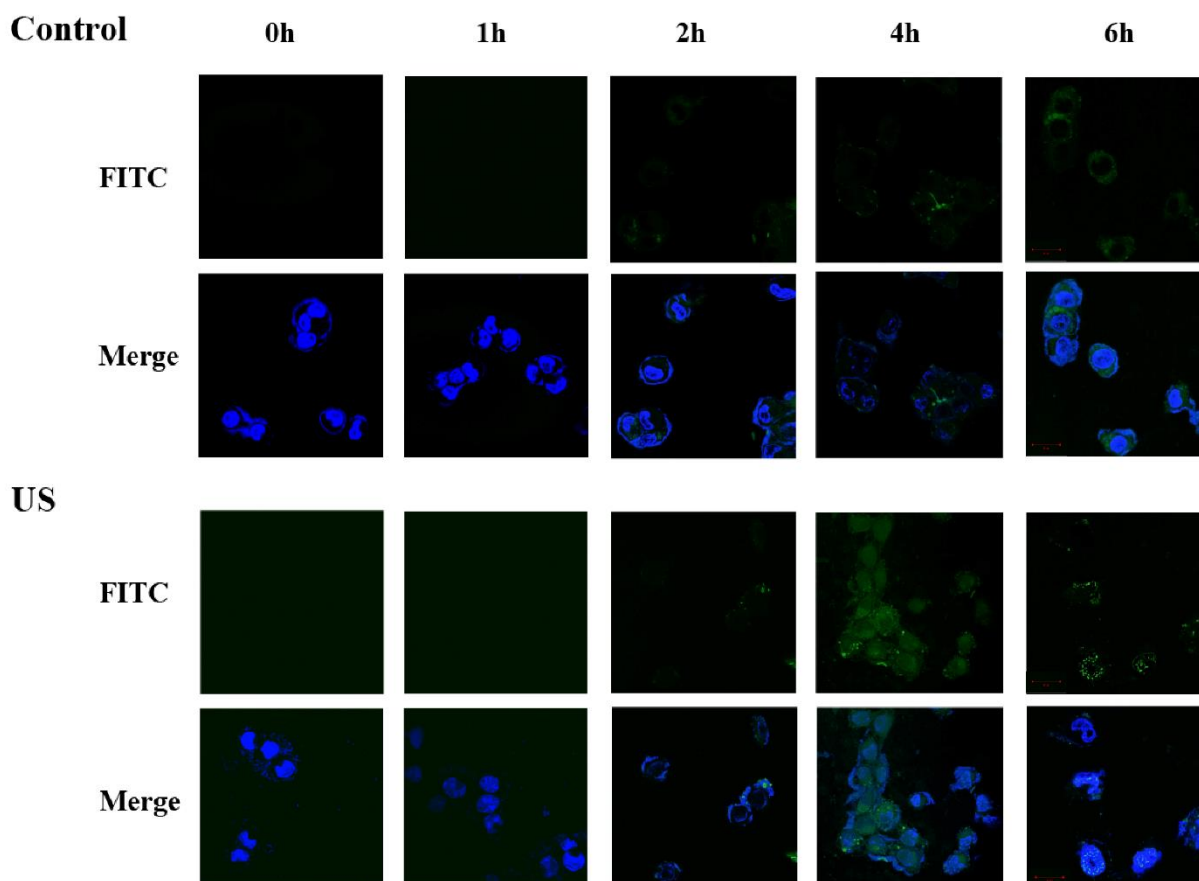

**Figure S10** The uptake evaluation of USPIO@PEG-LOD (100 ppm) at various times with ultrasound or not. The FITC-labeled USPIO@PEG-LOD nanoparticles were cultured with 4T1 cell for different times, and the sonic group was subjected to ultrasound stimulation for 1 minute (frequency of 1.0 MHz, power density of 1.0 W/cm<sup>2</sup>). The CLSM pictures were taken at 1, 2, 4,

6 hours of cultivation, scale bar, 20  $\mu\text{m}$ .

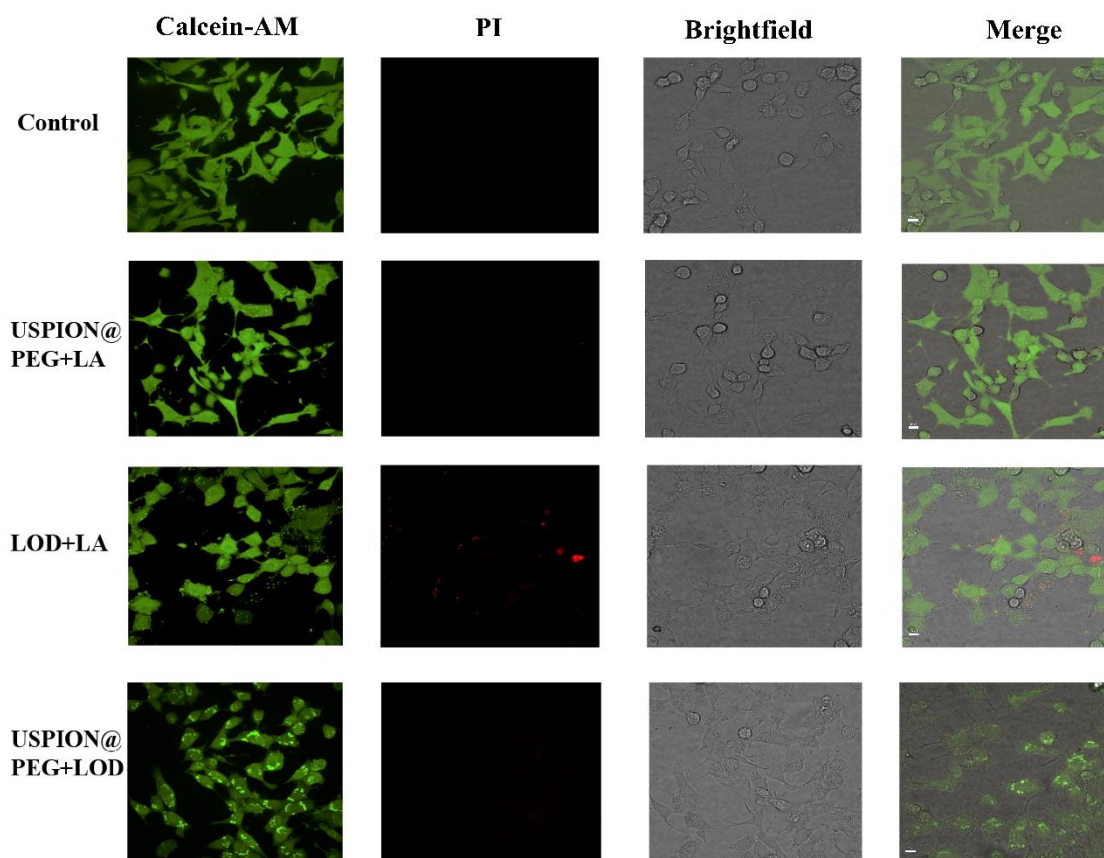

**Figure S11** The CLSM images of live or dead cell distributions after co-incubation for 4 hours under various conditions, followed by staining with calcein-AM/PI reagents for 15 minutes at 37  $^{\circ}\text{C}$ , scale bar, 10  $\mu\text{m}$ .

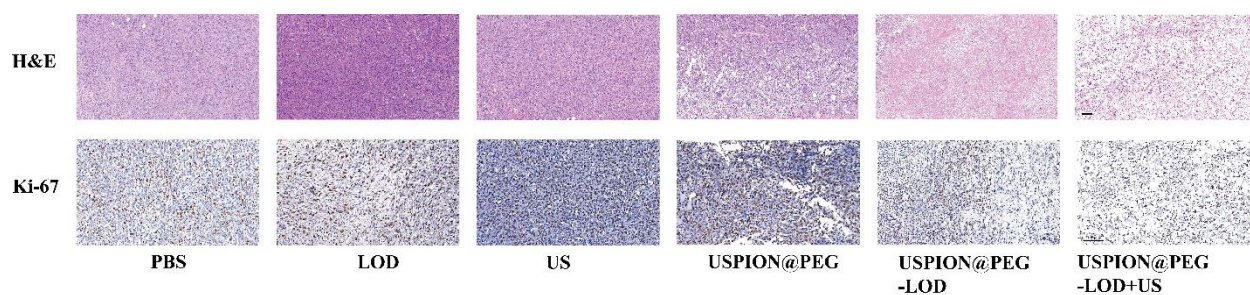

**Figure S12** The images of H&E and Ki-67 staining of tumor sections from different groups, scale bar, 100  $\mu\text{m}$ .

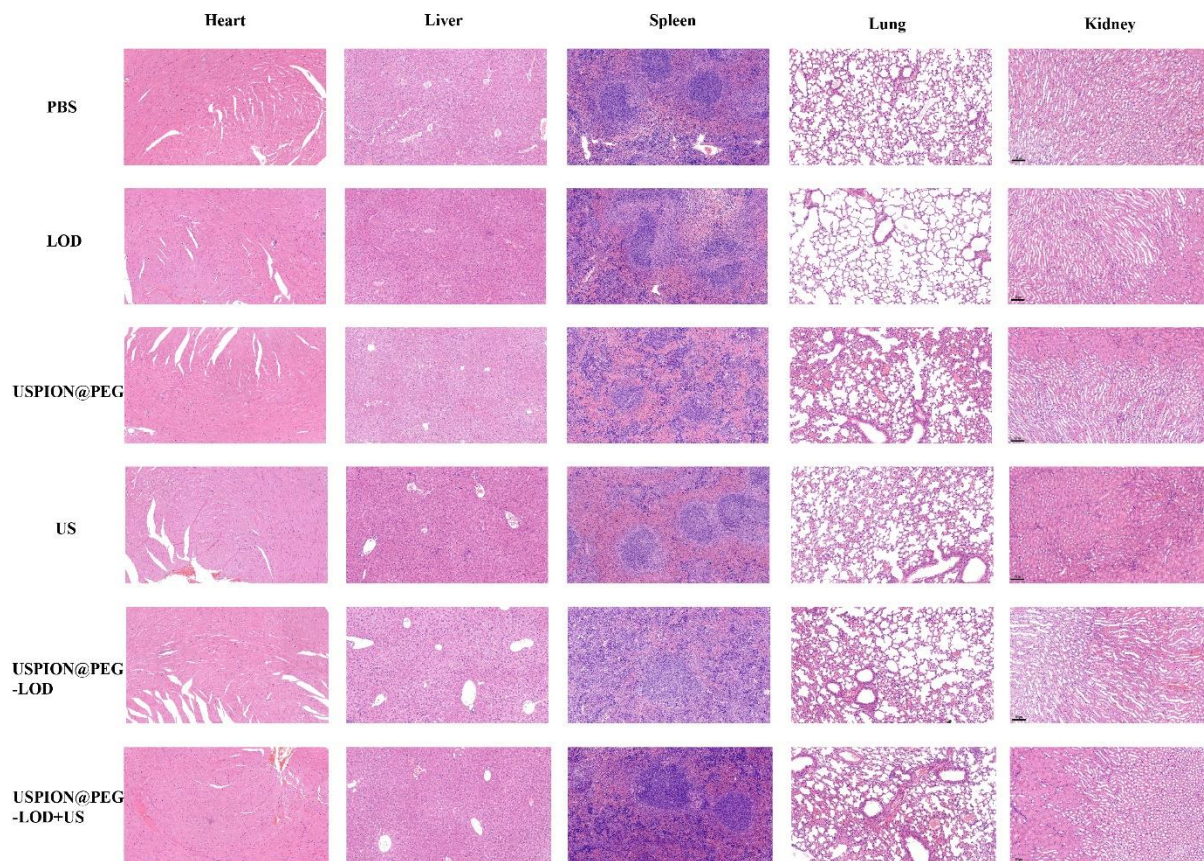

**Figure S13** The images of H&E staining of major organs sections from different groups after 14 days treatment, scale bar, 100  $\mu\text{m}$ .
